# Supplementary figures and images for: Elastase induced lung epithelial cell apoptosis and emphysema through placenta growth factor
Source: PubMed Central journal article supplement — Cell Death Dis. 2013 Sep 5;4(9):e793–. doi: 10.1038/cddis.2013.329 (PMC3789187; doi:10.1038/cddis.2013.329), 2013-09-05

Fig. 1S

(A)

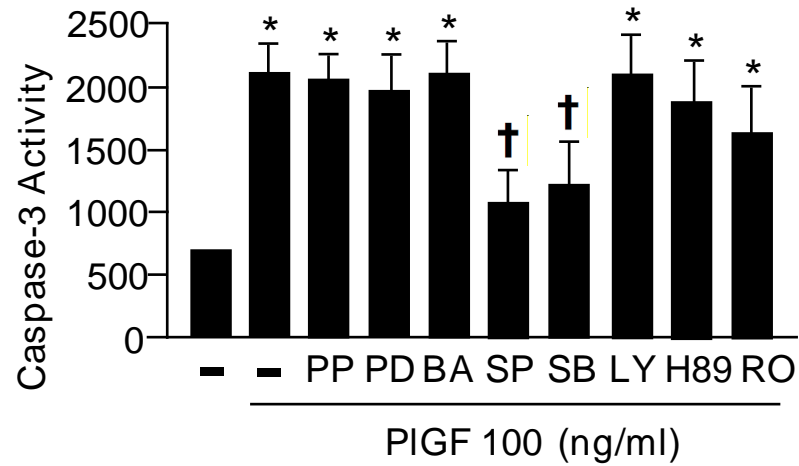

(B)

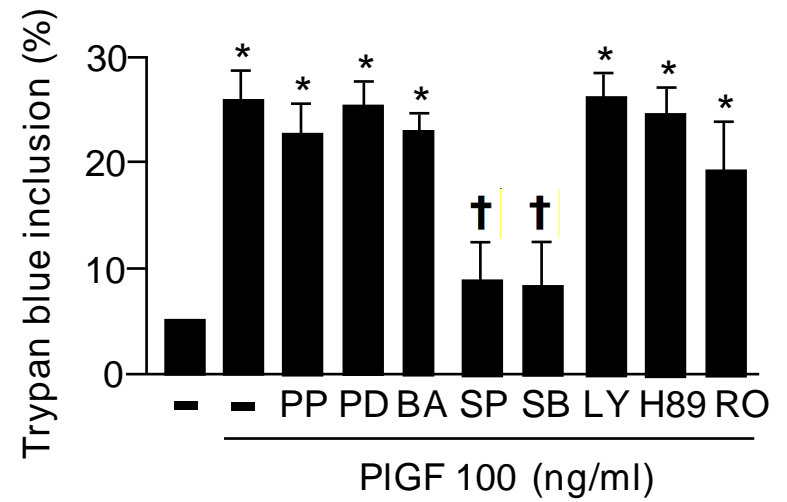

(C)

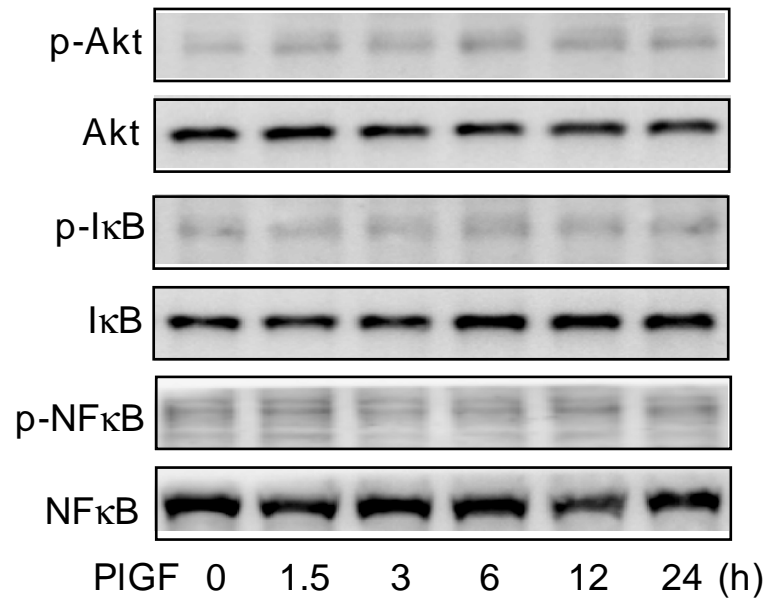

(D)

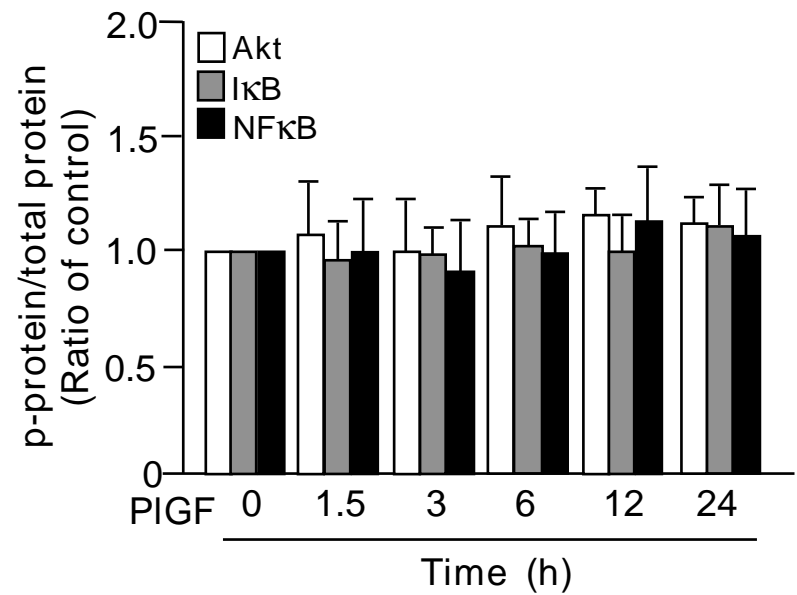

Supplement: cddis2013329x1.pdf [file cddis2013329x1.pdf]

Fig. 2S

(A)

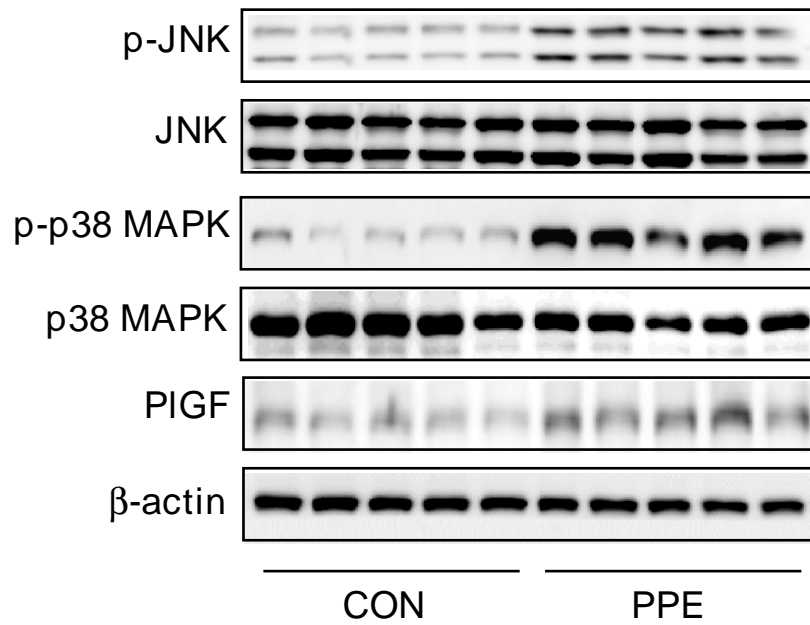

(B)

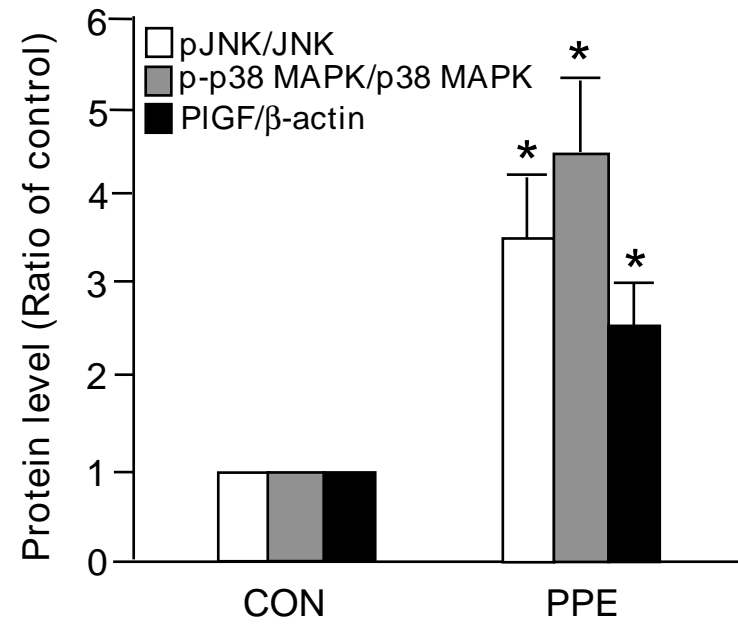

Supplement: cddis2013329x2.pdf [file cddis2013329x2.pdf]

Fig. 3S

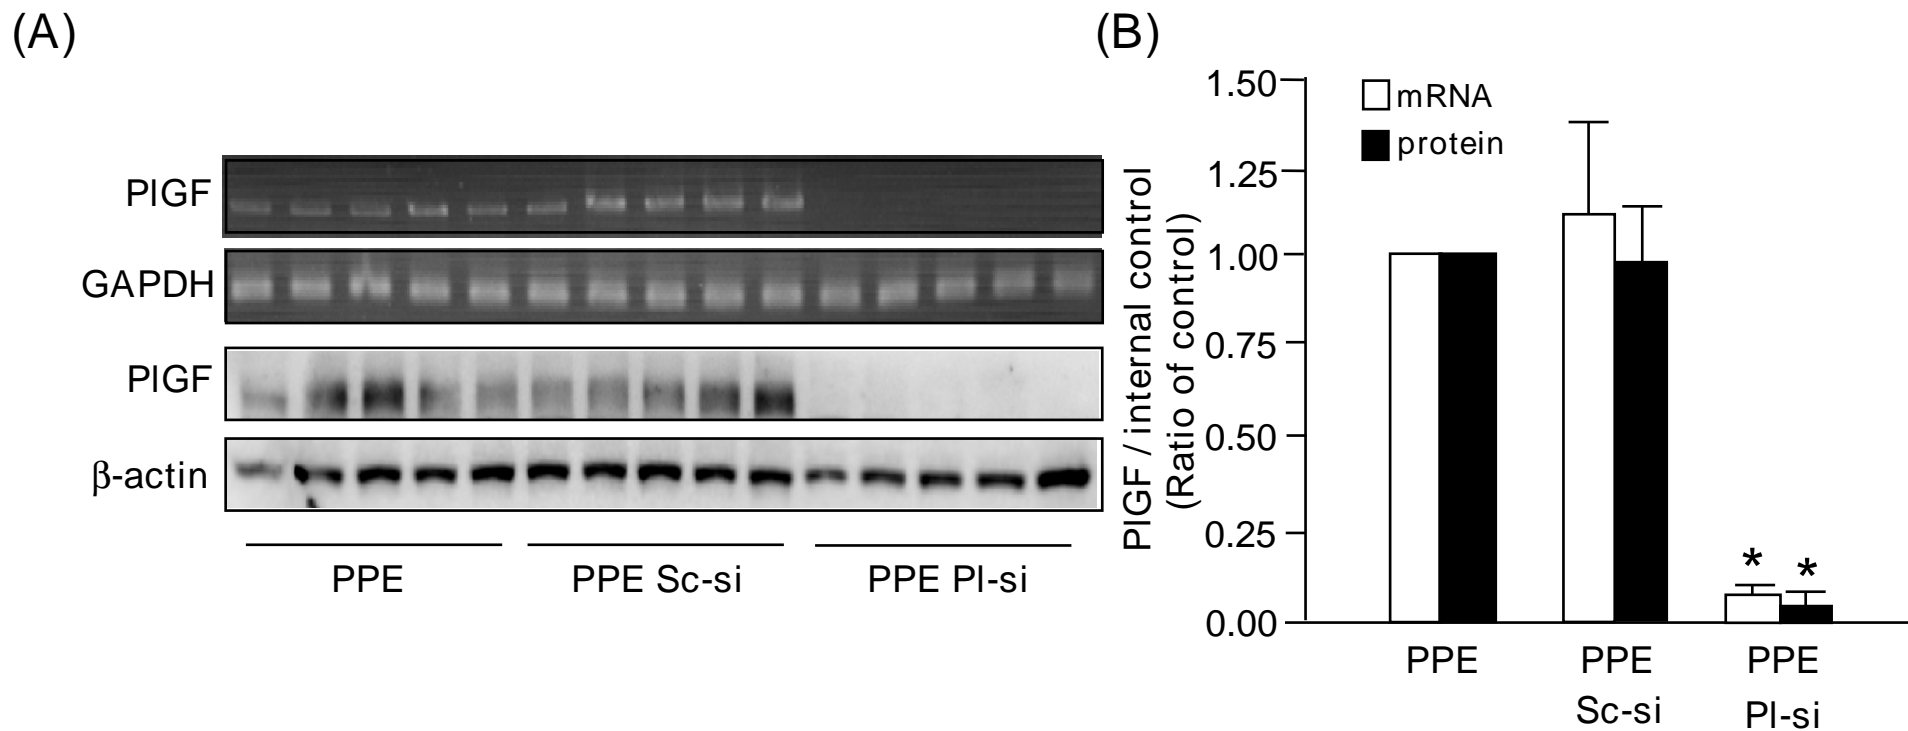

Supplement: cddis2013329x3.pdf [file cddis2013329x3.pdf]
